# Supplementary material for: LDHA Promotes Oral Squamous Cell Carcinoma Progression Through Facilitating Glycolysis and Epithelial–Mesenchymal Transition
Source: Front Oncol. 2019 Dec 19;9:1446. doi: 10.3389/fonc.2019.01446 (PMC6930919; doi:10.3389/fonc.2019.01446)
Supplement: Supplementary Data Sheet 2 — Enriched gene sets of GSEA. [file Table_2.XLSX]

## Sheet: GSEA hallmark
ID	setSize	enrichmentScore	NES	pvalue	p.adjust	FDR	rank	leading_edge	core_enrichment
HALLMARK_ALLOGRAFT_REJECTION	200	0.456474	2.11482	0.00117096	0.00237158	0.00049928	4490	tags=40%, list=24%, signal=31%	2069/3624/3553/4283/7453/1029/2650/6772/3383/3589/6890/6354/894/4869/3458/9734/3091/7097/7042/3665/8444/6352/6059/3606/8767/1615/2113/6891/1956/3594/114548/3135/7124/2533/567/961/2316/5917/11146/7040/7098/1984/672/3105/8661/3566/5551/6351/5699/4830/941/3002/8915/3717/3460/9466/1230/3600/7334/8651/3455/958/3133/356/355/8669/3569/2000/10006/942/8672/3574/11222/6885/972/3586/3559/3459/3122/822
HALLMARK_APICAL_JUNCTION	200	0.406516	1.88337	0.00117096	0.00237158	0.00049928	3077	tags=34%, list=16%, signal=28%	3909/1308/3918/7045/347902/3675/1001/87/3691/3688/51474/3383/1041/3673/6624/3914/4478/7087/7410/5522/247/29126/3667/10487/51776/91624/5921/147/1956/2770/4628/2533/5747/5880/5216/60/3265/1024/999/6237/4627/3881/149461/2683/8754/103910/7283/6251/794/7106/7414/55742/6464/80381/9019/30835/1825/10109/64398/1495/1265/71/1823/10458/3728/6714/81
HALLMARK_COMPLEMENT	200	0.391684	1.81465	0.00117096	0.00237158	0.00049928	5009	tags=43%, list=26%, signal=32%	2152/5054/760/1515/5055/1848/978/5698/8851/4321/1075/54704/834/2764/3665/51056/6352/837/7128/966/1012/2773/5359/4973/9732/10938/308/2335/838/6283/3659/5216/5251/1514/629/3796/8754/3309/2919/5329/808/5321/10019/5550/3002/840/6280/80124/9958/9097/5265/868/3717/391/1847/23348/3660/4323/10600/6714/4322/11216/6047/3075/4048/3958/1284/3569/5663/51734/714/836/11108/718/9986/9101/7941/8942/3937/801/7980/…
HALLMARK_E2F_TARGETS	200	0.614682	2.84779	0.00117096	0.00237158	0.00049928	5764	tags=80%, list=30%, signal=57%	1029/3161/9787/9833/6790/10527/4609/991/1062/81624/10051/5347/1033/55143/994/3838/10606/55635/10733/4683/4085/1965/64858/29028/701/6241/55646/1111/7153/4288/24137/9837/1164/11004/4173/29127/79733/9319/4001/5901/1434/9221/1786/9133/5591/9232/5983/29893/5558/5885/10111/23594/9212/9972/57122/5395/672/2935/1503/10635/7283/332/1026/983/23165/4830/10492/204/675/10714/11113/203068/5981/146909/4436/993/7…
HALLMARK_EPITHELIAL_MESENCHYMAL_TRANSITION	200	0.468312	2.16966	0.00117096	0.00237158	0.00049928	2579	tags=33%, list=14%, signal=29%	374/3909/7424/5744/4907/5054/3918/3624/7045/7057/4312/3576/3678/3688/10272/2303/11010/51330/4314/3673/7078/3371/6385/6591/8076/3956/2191/4017/2201/5270/7052/7128/6372/871/966/5352/6422/8572/960/2014/2335/10409/284217/667/2316/800/7040/388/1282/7422/22795/2919/1303/5351/5329/9235/5817/813/1000/50509/1647/7171/8985/1314/3685/3600
HALLMARK_ESTROGEN_RESPONSE_EARLY	200	0.3421	1.58493	0.00117096	0.00237158	0.00049928	3026	tags=30%, list=16%, signal=26%	374/6566/91683/5174/360/29984/56603/4609/8140/4277/10202/2317/6513/8204/23596/5932/25976/26509/2274/7162/23541/7052/2289/11031/2810/7071/89797/5655/9536/960/4603/5366/23286/11098/80004/10105/1952/2683/79875/8614/794/3898/595/3856/10514/3717/6820/64699/25800/1997/124583/55806/375449/7869/771/3875/3705/10140/2296/9022/18
HALLMARK_ESTROGEN_RESPONSE_LATE	200	0.38852	1.79999	0.00117096	0.00237158	0.00049928	3057	tags=32%, list=16%, signal=28%	374/857/3918/6566/7054/8900/760/2707/10112/5174/56603/2171/8140/991/4277/10202/2317/8204/23596/11187/5932/10761/26509/7162/10733/2289/11031/2810/5655/7153/6491/9536/960/2582/6652/11098/22824/4338/7264/999/51599/10105/29887/445/1952/56339/2030/6280/990/595/5265/3717/6820/9231/64699/3251/55806/7869/771/51659/3705/10140/2296/9022/3669
HALLMARK_GLYCOLYSIS	200	0.445422	2.06362	0.00117096	0.00237158	0.00049928	3293	tags=38%, list=17%, signal=32%	4907/3939/5318/7045/54541/7039/5836/10331/3161/10112/5214/8974/205/6790/5230/51129/4233/6662/30001/5223/5315/7162/55635/2023/136/5091/5373/2131/6781/5033/5352/501/1956/960/5066/2582/9123/53836/2132/5917/9456/7264/7422/3099/3796/2683/3309/8870/2585/983/8614/6120/2997/5351/1058/10370/55276/7167/112399/11319/10007/1824/4200/5478/226/23443/56956/375790/10165/3669/839/10776/56052/2026/9435/1491
HALLMARK_HYPOXIA	200	0.432846	2.00535	0.00117096	0.00237158	0.00049928	3279	tags=36%, list=17%, signal=31%	2152/857/3939/5054/7045/4502/4493/10397/54541/8406/5214/8974/205/8609/5230/51129/30001/6385/6513/133/54206/25976/3219/26136/272/7162/2023/136/7052/25819/2131/7128/5228/284119/6781/2113/5033/1956/5066/302/2908/5236/5163/901/5209/7422/2597/4627/3099/3309/8870/1026/8614/2997/5329/10370/112464/55276/1316/7167/6820/3340/9957/2821/771/226/665/3669/9469/839/9380/2026/9435
HALLMARK_INFLAMMATORY_RESPONSE	200	0.520875	2.41319	0.00117096	0.00237158	0.00049928	3984	tags=48%, list=21%, signal=38%	2069/6373/3552/3627/2152/5054/3624/3553/4283/1318/1440/3576/5099/131566/3678/10630/8519/3037/4210/6364/684/3383/4609/6354/6098/4233/133/3949/3091/7162/7097/970/136/3665/6352/3606/623/8767/6372/166929/2773/3656/4061/64108/4973/5791/5610/114548/2014/6541/9111/3659/1839/558/7098/2769/3269/3575/3566/64127/1026/5724/5329/2867/5817/7130/1316/3601/7855/391/8877/3460/4084/9180/4790/8744/3600/255488/23601…
HALLMARK_INTERFERON_GAMMA_RESPONSE	200	0.637963	2.95565	0.00117096	0.00237158	0.00049928	4096	tags=65%, list=22%, signal=52%	6373/3627/116071/55601/4283/4502/7453/3437/3434/4940/54739/8638/5743/4939/3433/10561/64135/219285/23586/10964/91543/10410/6737/55008/3429/6772/5214/684/3383/9246/9636/6890/94240/3620/6354/5698/4599/11274/85441/3431/3091/4600/4860/129607/834/29126/3665/51056/6352/80830/837/3430/7128/8767/669/5359/3959/64761/4061/64108/5371/57169/5610/25939/3135/3106/7378/9111/567/3659/5770/5696/23424/8869/6398/115…
HALLMARK_MYC_TARGETS_V1	200	0.583092	2.70143	0.00117096	0.00237158	0.00049928	6767	tags=86%, list=36%, signal=56%	3939/4609/5230/991/4869/9188/890/1176/3838/4085/1965/6059/7416/5687/6240/1982/4173/2739/5901/9221/5682/10576/10146/821/3329/7965/1665/1977/10971/9184/2079/3326/26135/5634/2935/11137/3837/7458/1503/1207/51491/3183/5093/1964/708/3376/26156/5245/11335/6418/4830/10492/22948/7298/26986/4686/6741/7027/7203/7531/3735/10987/6732/6950/5887/5036/2107/3015/6742/7913/3251/10935/328/54107/5478/5690/4175/10575…
HALLMARK_TNFA_SIGNALING_VIA_NFKB	200	0.564581	2.61567	0.00117096	0.00237158	0.00049928	4357	tags=52%, list=23%, signal=41%	6373/1437/374/3552/3627/2152/5054/3624/3553/5055/5743/3433/64135/23586/8061/6364/24147/3383/6890/3914/4609/2150/2921/3371/150094/6385/24145/3949/22822/25976/1846/10769/5328/7097/6352/7128/3606/7071/2114/8767/6372/10725/7262/25816/7280/4973/5791/960/10938/329/7124/3659/23529/1839/388/5209/7422/3575/23258/2683/8870/2919/1026/6351/182/5329/55332/941/650/51278/7130/1316/595/3601/1647/8877/3460/4084/4…
HALLMARK_IL2_STAT5_SIGNALING	199	0.361273	1.67286	0.00117509	0.00237158	0.00049928	5182	tags=40%, list=27%, signal=29%	1437/3627/4907/760/10397/9173/84230/10410/3655/4609/894/64866/81848/5621/22822/4860/7850/27242/4643/7052/5339/5033/5359/23075/3664/960/388/3099/6050/115361/8728/23258/307/3566/79971/650/1316/990/4641/79026/4084/56990/3685/8651/23191/200734/11217/196/57231/23413/57045/942/3482/4839/1893/191/8743/8829/836/29851/285172/3586/3559/3459/8202/822/598/84306/10970/51651/3480/9910/4582/4783/8320/80324/1522…
HALLMARK_KRAS_SIGNALING_UP	199	0.41477	1.92058	0.00117509	0.00237158	0.00049928	2147	tags=24%, list=11%, signal=21%	2069/1437/3627/26499/3624/3553/7476/4319/760/1848/131566/80380/5743/7851/6364/3673/101/90865/2591/2150/894/51129/6662/30001/9734/55107/6590/5328/6447/7128/2048/2113/669/10103/9949/1839/5696/6868/3783/3575/629/5329/650/80201/867/11179/51012
HALLMARK_MITOTIC_SPINDLE	199	0.511319	2.36765	0.00117509	0.00237158	0.00049928	7972	tags=80%, list=42%, signal=47%	54443/9787/6624/6790/5829/1062/2317/55785/10051/5347/7272/699/9585/9493/4643/9411/9793/5921/3797/10403/7277/7153/24137/22974/1063/9732/11004/29127/4001/4628/3619/23647/9133/394/667/2316/4751/996/163786/23607/10276/4627/6093/22930/51203/1894/26271/332/56992/50628/7430/983/7414/10928/9055/675/3832/7531/9564/55704/6453/5981/396/998/11346/3996/10801/9113/6249/2017/6711/50650/382/81/151987/9126/22919/…
HALLMARK_MTORC1_SIGNALING	199	0.526183	2.43647	0.00117509	0.00237158	0.00049928	5554	tags=61%, list=29%, signal=44%	3939/7453/10622/54541/205/6790/5230/8140/30001/6513/3949/27071/1075/5347/699/4860/26136/2023/6241/8624/871/6781/5033/7277/134429/5352/2965/4173/5236/6652/6917/821/5163/900/3329/51382/441024/10963/2597/6713/5464/1719/3099/80777/5719/3308/7283/3309/1026/51377/23165/26747/4074/47/3313/7323/2181/51109/10987/6319/5718/7167/10097/112399/993/10197/2107/5684/899/10797/6715/51569/3251/5478/2821/226/3156/8…
HALLMARK_P53_PATHWAY	199	0.434256	2.01081	0.00117509	0.00237158	0.00049928	7346	tags=64%, list=39%, signal=40%	3552/10397/54541/7039/1029/3691/9635/10544/8812/5268/3872/1030/6890/894/11202/8851/7421/351/578/247/834/10769/5925/2810/1012/6281/100/5791/317/7378/55270/900/64787/3265/1839/22824/7040/3714/23169/8870/1026/79651/55332/650/51278/10904/1647/8877/4084/1606/8744/8626/2872/23378/8651/10399/9883/8518/10458/10140/1263/11059/30836/3945/18/3732/8841/677/1969/2760/355/22891/6236/3094/9538/10628/6520/64065/…
HALLMARK_G2M_CHECKPOINT	198	0.607939	2.81146	0.00117786	0.00237158	0.00049928	6075	tags=80%, list=32%, signal=55%	4502/3161/6790/4609/8140/991/1062/10051/5347/7272/3091/699/9585/1033/890/9493/7150/10419/994/3838/10733/11065/4085/51776/4928/1111/10403/7153/4288/6491/24137/22974/81539/5371/1063/1164/11004/29127/4001/3312/9221/3619/9133/6541/10146/9232/55872/4331/57082/7040/5558/4751/5885/23594/9212/9184/996/6713/10592/51203/2935/26271/3837/4691/332/9994/56992/983/1058/262/10492/9055/675/10926/3151/3832/990/595…
HALLMARK_APOPTOSIS	161	0.504072	2.28266	0.0011919	0.00237158	0.00049928	4085	tags=47%, list=21%, signal=37%	2069/3552/857/3553/9638/8900/3489/10410/51330/7078/6890/1806/894/351/834/6574/994/301/7042/837/3606/7153/3301/960/7124/3659/5747/5366/552/388/2769/6093/672/5551/8870/1026/650/56616/840/595/8915/1647/5058/7465/2107/10059/4170/841/3456/3875/1017/665/3669/1499/839/3148/2026/1491/330/356/3958/355/5526/3569/1676/10628/5663/3482/2643/7417/8743/599/5970/118/836
HALLMARK_OXIDATIVE_PHOSPHORYLATION	185	0.429667	1.96882	0.00119332	0.00237158	0.00049928	8999	tags=71%, list=47%, signal=38%	3939/54704/29088/7416/8803/1743/51382/80273/1352/3313/840/9927/3052/26520/528/10935/2746/2821/4724/51606/211/1737/3945/54205/4712/10128/6390/4552/6391/5160/22/3419/1537/65003/1666/3032/10440/7417/593/64960/34/23203/4967/527/2395/10884/3030/2806/7385/6389/9617/5018/10939/55288/27429/54884/4942/4702/81689/1431/38/51318/56945/9167/5250/1353/9868/8992/9550/7384/292/10989/9131/6832/1738/581/4190/2108/…
HALLMARK_DNA_REPAIR	149	0.453459	2.0366	0.00121655	0.00237158	0.00049928	8392	tags=74%, list=44%, signal=42%	978/4860/129607/100/6880/2965/5983/51251/7251/2967/4830/7298/10714/1479/51164/6878/6884/1161/23204/11130/5557/6809/5430/5422/6386/51292/3251/124583/5898/6749/6883/9883/11051/4059/5888/10978/8731/2959/10959/1642/8178/5440/50484/2237/2072/5985/4090/5432/5429/23649/404672/51082/6924/10946/1643/8480/3615/3978/6119/5111/53343/5424/11047/1603/6881/50808/5980/286075/79720/4799/2962/5436/2071/6431/2067/2…
HALLMARK_UNFOLDED_PROTEIN_RESPONSE	112	0.527779	2.25677	0.00128205	0.00237158	0.00049928	7765	tags=77%, list=41%, signal=46%	3434/54541/8140/4869/30001/1965/9652/7280/7534/9221/55153/1977/5394/55770/9775/10130/7422/3309/50628/8614/57472/3376/8602/3313/6464/22872/1163/6897/1736/10797/10525/64859/10897/23404/811/8815/1639/4800/1662/7184/23644/6208/55033/9136/3799/1938/10954/5393/55651/8570/11260/10528/54512/9570/6745/9531/5073/10605/60559/5832/1978/23478/1973/1981/3014/4850/9114/55802/2521/11015/167227/5611/4848/51013/55…
HALLMARK_ANDROGEN_RESPONSE	99	0.407503	1.7154	0.00129702	0.00237158	0.00049928	5788	tags=55%, list=30%, signal=38%	8821/87/10397/1021/8916/54407/6675/6611/2289/2773/25816/22936/6652/567/2683/658/2181/595/3856/6319/5036/354/2185/9218/3685/5238/3156/10627/9053/55839/27347/6197/9455/23585/56937/7520/10788/4824/9871/6728/3998/10257/8031/10611/23223/9510/11047/896/8554/1718/60559/207/11099/10645
HALLMARK_PROTEIN_SECRETION	95	0.467622	1.95356	0.00130039	0.00237158	0.00049928	7203	tags=78%, list=38%, signal=49%	664/858/1315/1075/1176/163/9805/476/1956/5066/667/81542/7251/9522/102/57403/10972/8546/4074/8027/22872/9367/8417/27236/10059/3875/9341/8615/51606/81611/1213/372/6197/10959/19/259230/9183/10564/10040/2803/164/5862/10565/3482/10652/9525/9871/8773/51552/9554/3998/375/5594/8774/8775/9570/1211/6643/8729/3920/1203/2778/51614/4952/10282/5868/1175/6845/6647/9276/23673/23095/11079/8675
HALLMARK_INTERFERON_ALPHA_RESPONSE	96	0.721716	3.01829	0.00130378	0.00237158	0.00049928	3266	tags=75%, list=17%, signal=62%	6373/3627/116071/55601/7453/3437/8638/8519/3433/10561/64135/219285/10544/10964/91543/10410/85363/6737/55008/3429/684/9246/9636/6890/94240/54809/5698/4599/11274/4938/85441/3431/129607/834/3665/51056/3430/8767/5359/3959/64761/4061/64108/5610/3107/9111/567/3659/961/5696/23424/4343/115361/3566/83666/9830/5721/5720/87178/54625/55072/5684/3660/3600/1997/841/23070/6773/7318/3669/27074/79132
HALLMARK_IL6_JAK_STAT3_SIGNALING	87	0.516014	2.11713	0.00131062	0.00237158	0.00049928	4602	tags=48%, list=24%, signal=37%	6373/1437/3627/3553/4283/51330/6772/6354/2921/578/7850/7097/27242/56034/3594/960/7124/3659/5770/7040/3566/2919/5781/867/3601/3460/9180/1230/8651/6773/4615/5771/355/3569/10254/3574/3572/4055/3559/3459/3676/9021
HALLMARK_MYC_TARGETS_V2	58	0.594218	2.26394	0.0013587	0.00237158	0.00049928	6294	tags=83%, list=33%, signal=56%	10196/4609/4869/5347/10733/51388/4173/9221/6652/27340/3329/7965/6949/10171/23160/3099/51491/5245/11335/51154/10514/5036/83743/9238/6723/8886/705/9136/4839/2193/26354/3336/27346/10244/23082/10528/7374/1019/23223/54663/79077/80324/6573/79711/64216/81887/6832/10199
HALLMARK_TGF_BETA_SIGNALING	54	0.501264	1.88398	0.00137552	0.00237158	0.00049928	7383	tags=74%, list=39%, signal=45%	5054/8412/7057/6574/11031/7071/7046/7040/999/4086/4053/650/7323/64750/3460/5499/7050/6711/1499/51592/56937/324/6885/387/5045/7082/1025/2280/4092/3065/2339/57154/6497/5494/659/28996/51742/90/23645/3726
HALLMARK_HEME_METABOLISM	197	0.326983	1.51248	0.00235294	0.00381098	0.000802311	5732	tags=39%, list=30%, signal=28%	760/360/8974/1510/4778/6513/23002/140609/7150/5091/55034/571/669/831/23568/10133/3043/22936/2908/10098/6917/55589/6583/10171/996/8301/3321/79269/10553/56895/9958/80853/25893/286/9562/8780/4140/6386/25897/7779/1039/682/4059/665/54/10158/23351/56674/63891/23052/5715/5526/129642/3068/118/718/26130/6535/23039/8031/4779/8833/27429/1371/10107/3145/896/81689/8945/3920/8867/2057/57610/23365/80148/27102/5…
HALLMARK_UV_RESPONSE_UP	158	0.342225	1.54405	0.00240964	0.00381098	0.000802311	4635	tags=39%, list=24%, signal=29%	3363/760/1515/3306/3383/360/1030/6890/3134/9188/578/2744/5471/7277/1280/10280/3301/3659/388/80273/1968/10105/10963/80777/51706/1212/885/262/650/2907/9818/528/6897/988/54107/226/4323/682/9/3175/1017/211/8836/6782/2026/2011/6236/3569/2237/10038/3192/10652/2643/2920/836/3572/7009/6535/27161/5702/6150
HALLMARK_UV_RESPONSE_DN	142	0.35263	1.57401	0.00243902	0.00381098	0.000802311	6214	tags=44%, list=33%, signal=30%	2152/857/5054/8821/4493/4052/3037/2650/4609/4233/7410/6591/3949/140609/2274/3667/136/7048/302/2908/6541/323/5293/307/26037/10370/4790/10486/6717/8871/493/27032/10240/8829/2697/1432/22828/5195/55109/390/10401/23469/3915/3480/10611/23116/4781/9112/5728/7082/91746/4853/4092/546/8621/11099/54468/7436/1290/5922/3690/1859
HALLMARK_PI3K_AKT_MTOR_SIGNALING	105	0.393169	1.67141	0.00256082	0.00388003	0.000816848	8690	tags=75%, list=46%, signal=41%	10451/6513/27071/51719/2810/1956/6195/1072/5163/5216/3265/1977/7529/1026/983/5781/5519/7323/10097/396/5499/2872/7334/6773/1213/1017/3709/811/4615/57521/6197/356/7184/5899/6885/10096/5335/375/5594/466/5571/1019/5601/4803/5728/79109/10094/57761/2932/31/8737/207/5879/10298/5606/7132/29110/5576/10392/81579/117145/2885/7186/1460/5599/81617/7074/3932/4690/84335/1173/4087/5894/5300/200576/8569/1845/5129…
HALLMARK_KRAS_SIGNALING_DN	198	-0.348979	-1.88328	0.00653595	0.00961169	0.00202351	2657	tags=33%, list=14%, signal=29%	79917/5625/1950/9194/9992/6528/4908/26548/83714/4842/1158/5077/29903/56997/51168/29799/3785/29930/5158/3750/55220/786/8823/7068/8471/7032/3425/2813/3780/6262/51384/6707/7038/55190/10734/10753/4625/6261/7367/1360/58157/495/5020/6531/2593/5737/6414/2044/676/152/525/2895/5409/7781/10991/8786/1630/56154/5071/3860/3851/3195/7021/51087/9073
HALLMARK_MYOGENESIS	200	-0.340531	-1.83503	0.00675676	0.00965251	0.00203211	2767	tags=32%, list=15%, signal=27%	7135/4635/5816/1674/4656/6442/9172/6649/4608/1346/4842/1158/4633/859/3479/7136/3908/5348/9215/4151/22924/5569/3270/11155/6588/11156/187/786/88/58/8048/3757/2878/4626/7134/948/1191/8736/2027/844/58529/4625/4622/6261/1837/4634/6445/29895/4620/4629/5740/8557/1339/65055/7140/4619/43/5837/7125/347/487/3756
HALLMARK_ANGIOGENESIS	36	0.480394	1.66892	0.00973574	0.0135219	0.00284671	2568	tags=33%, list=14%, signal=29%	894/7410/351/27242/6372/6781/4973/5747/7422/3714/182/3685
HALLMARK_COAGULATION	138	0.320729	1.42345	0.0197775	0.0267264	0.0056266	1709	tags=17%, list=9%, signal=16%	2152/5054/4319/1515/5055/7057/4312/1848/4314/3673/7078/1510/8609/11202/5328/301/4973/2335/11098/11072/10411/55970/629/8754
HALLMARK_CHOLESTEROL_HOMEOSTASIS	74	0.364393	1.45303	0.0250329	0.0329381	0.00693433	5005	tags=42%, list=26%, signal=31%	51330/2171/54206/3949/118429/312/2731/5359/134429/2770/308/552/6713/114569/26270/182/5329/6319/6282/7869/71/3156/1499/3958/27346/493869/23474/1595/132864/2194/4783
HALLMARK_XENOBIOTIC_METABOLISM	199	-0.240612	-1.29556	0.0331126	0.042452	0.00893727	2255	tags=20%, list=12%, signal=18%	4355/3479/1586/55502/7299/3487/84913/57447/1562/948/51733/7274/2192/5730/3273/5627/3083/2159/8529/2052/383/1644/2328/5967/2948/1593/26998/2940/1646/8644/1571/1036/2651/126/218/5950/131/1066/1592
